# Supplementary material
Source: publisher figshare collection journal article supplement (https://acs.figshare.com/ndownloader/files/4665919)
Supplement: Supplementary file 1 [file 4665919]

# Nanoprecise Spontaneous Coating of Carbon Nanotubes with a Europium Hydroxide Layer

*Martin Pumera\*, Miloš Čabala, Kateřina Veltruská, Izumi Ichinose, Jie Tang*

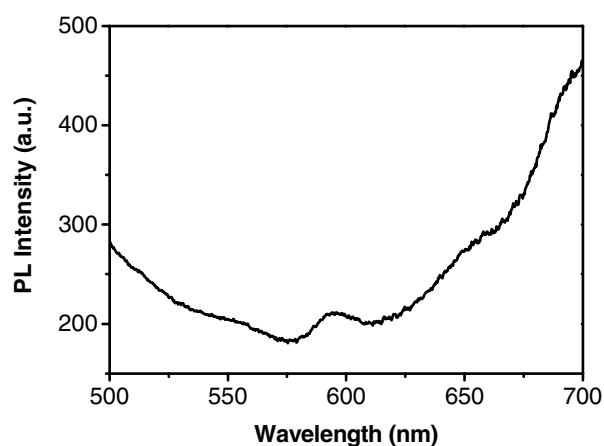

**Figure S-1.** Photoluminescence spectra of europium hydroxide coated MWCNT after subtraction of MWCNT spectra. The excitation wavelength was 396 nm, other conditions as in Figure 3 (in main article).
